# Supplementary material for: Exploration of phase diagram, structural and dynamic behavior of [HMG][FSI] mixtures with NaFSI across an extended composition range
Source: Royal Society of Chemistry journal article supplement (doi:10.1039/d2cp01910h), 2022-01-01
Supplement: d2cp01910h1.pdf [file d2cp01910h1.pdf]

## Supporting Information for Publication

### Exploration of phase diagram, structural and dynamic behavior of [HMG][FSI] mixtures with NaFSI across an extended composition range

Karolina Biernacka<sup>a</sup>, Faezeh Makhlooghiyazad<sup>a</sup>, Ivan Popov<sup>b</sup>, Haijin Zhu<sup>a</sup>, Jean-Noël Chotard<sup>c</sup>, Luke A. O'Dell<sup>a</sup>, Alexei P. Sokolov<sup>b</sup>, Jennifer M. Pringle<sup>a</sup>, Maria Forsyth<sup>\*a</sup>

<sup>a</sup> ARC Centre of Excellence for Electromaterials Science (ACES), Institute for Frontier Materials (IFM), Deakin University, Geelong, Victoria 3216, Australia

<sup>b</sup> Chemical Sciences Division, Oak Ridge National Laboratory, Oak Ridge, Tennessee 37831, United States

Department of Chemistry, University of Tennessee, Knoxville, Tennessee 37996, United States

<sup>c</sup> Laboratoire de Réactivité et de Chimie des Solides (LRCS), CNRS UMR 7314, Université de Picardie Jules Verne, 80039 Amiens Cedex, France

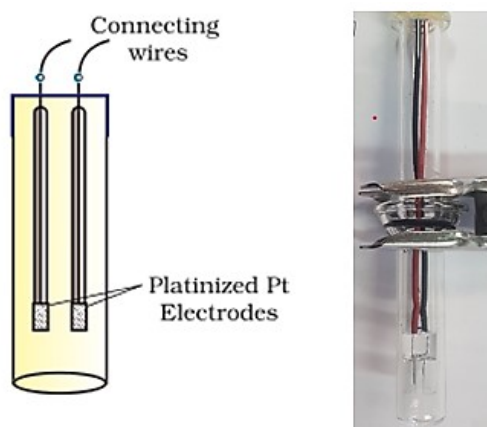

Figure S1. The design of the locally made dip-cell that was used for ionic conductivity measurements.

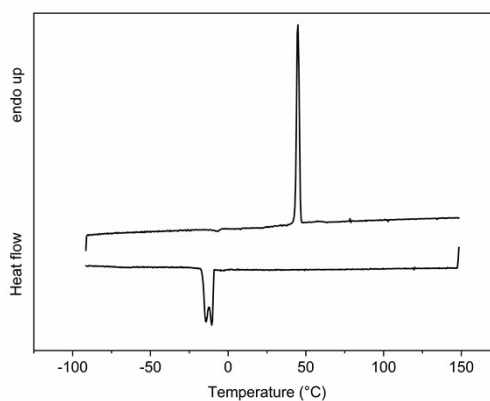

Figure S2. DSC thermogram of 25mol% NaFSI in [HMG][FSI], recorded during the second heating scan after melting and cooling the sample to -40°C, measured at 2 °C/min.

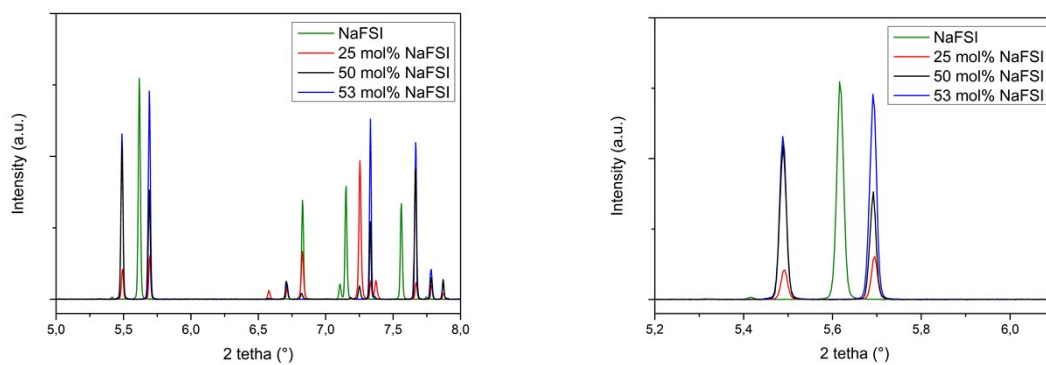

Figure S3. Synchrotron powder patterns measured at 25°C of pure NaFSI (green), with 25 mol% NaFSI (red), 50 mol% NaFSI (black) and 53 mol% NaFSI (blue). The left panel displays the powder patterns between 5 and 8° in 2θ, while the right panel shows the patterns between 5,2 and 6° in 2θ.

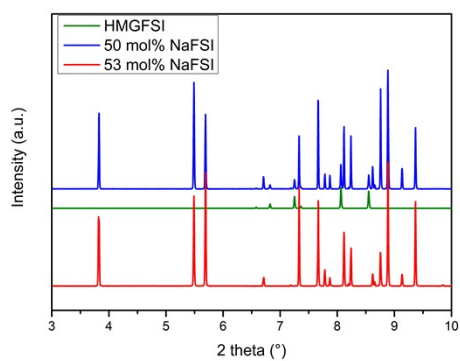

Figure S4. Synchrotron X-Ray Powder Diffraction patterns measured at 25°C of 50 mol % NaFSI (blue), 53 mol% NaFSI (red) and [HMG][FSI] (green). The 50 mol% NaFSI pattern (blue) is a combination of the [HMG][FSI] pattern (green) and 53 mol% NaFSI pattern (red).

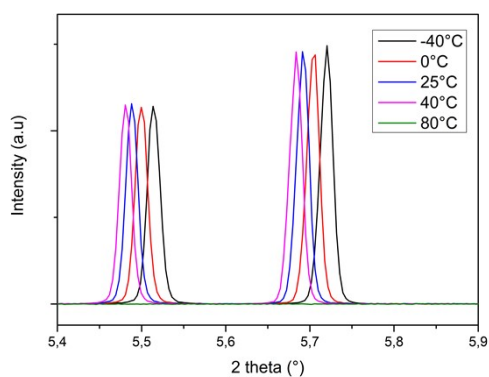

Figure S5. Temperature controlled Synchrotron X-Ray Powder Diffraction patterns of 53 mol% NaFSI ranging from -40°C to 80°C. A regular shift toward the low angles (higher d-spacing) is observed when the temperature is increasing.

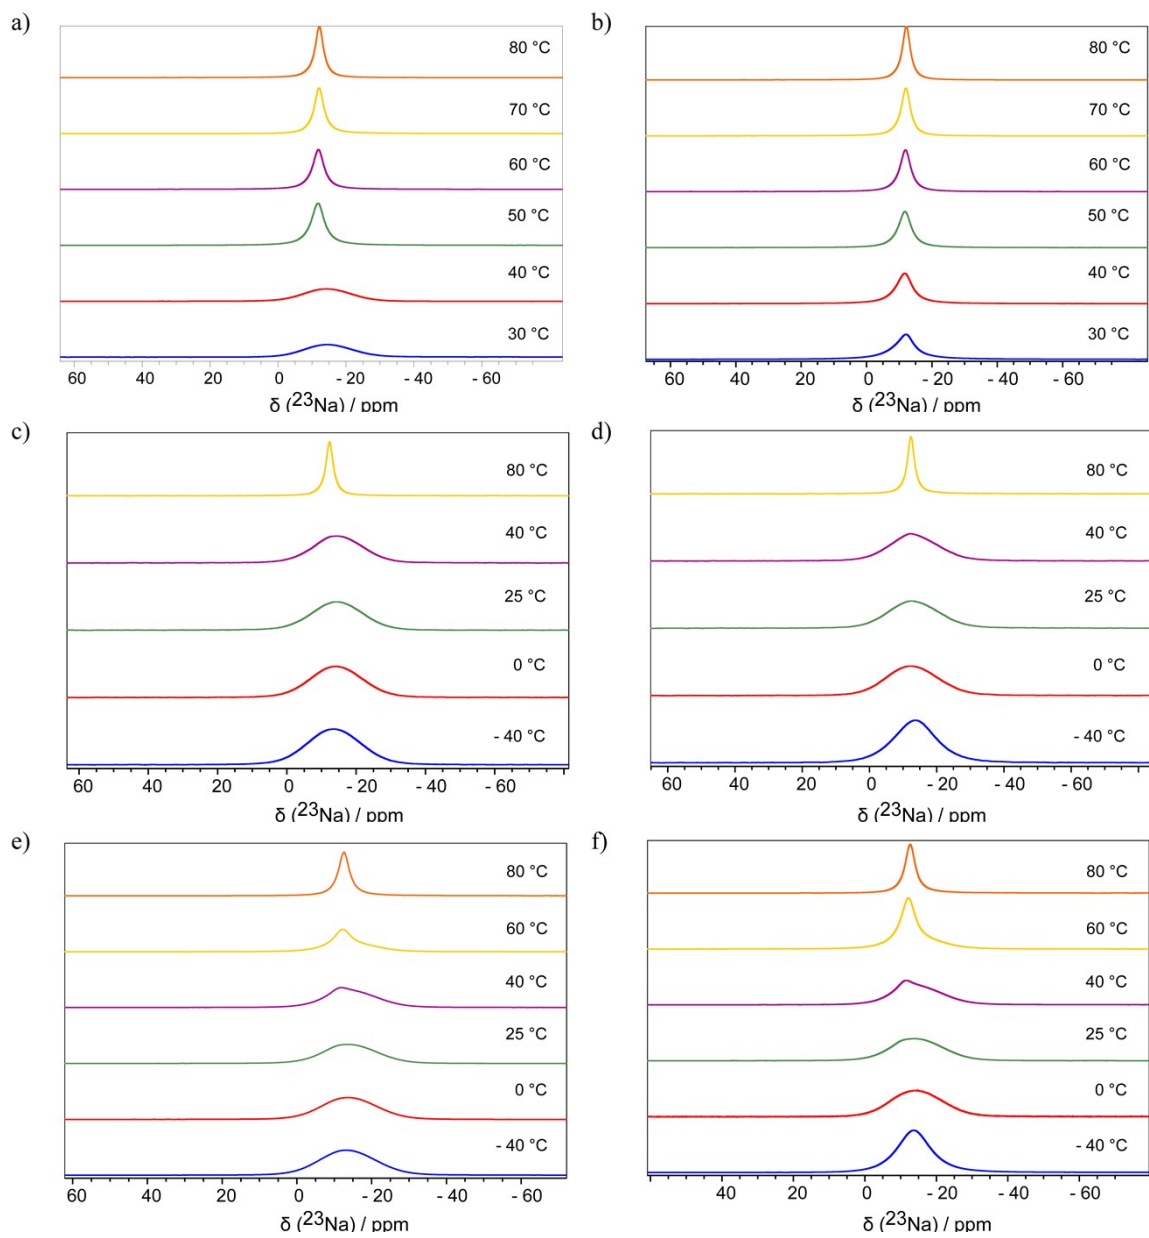

Figure S6. The evolution of  $^{23}\text{Na}$  spectra versus temperature for 25 mol% NaFSI recorded during first (a) and second (b) heating scan 30 to 80 °C and first (c) and second (d) heating scan -40 to 80 °C.  $^{23}\text{Na}$  spectra: stack spectra of 50 mol% NaFSI mixture recorded at various temperatures during the first (e) and second (f) heating scan from -40 to 80 °C.

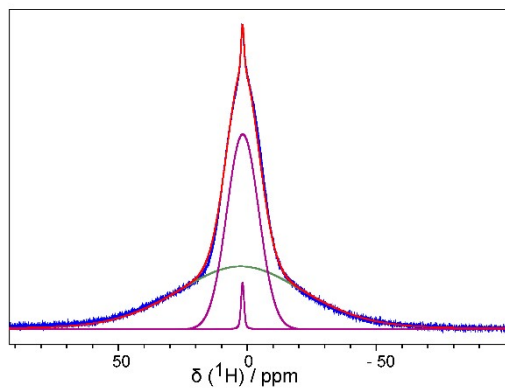

Figure S7. Deconvolution of  $^1\text{H}$  spectra recorded during second heating cycle at 0 °C for 25 mol% NaFSI (blue). Component 1, the broadest part of the peak in green, components 2 and 3 are represented by purple linewidths. Sum of all three components displayed in red.

---
